# Supplementary figures and images for: Cold-Active Lipase-Based Biocatalysts for Silymarin Valorization through Biocatalytic Acylation of Silybin
Source: MDPI journal article supplement (doi:10.3390/catal11111390), 2021-11-17

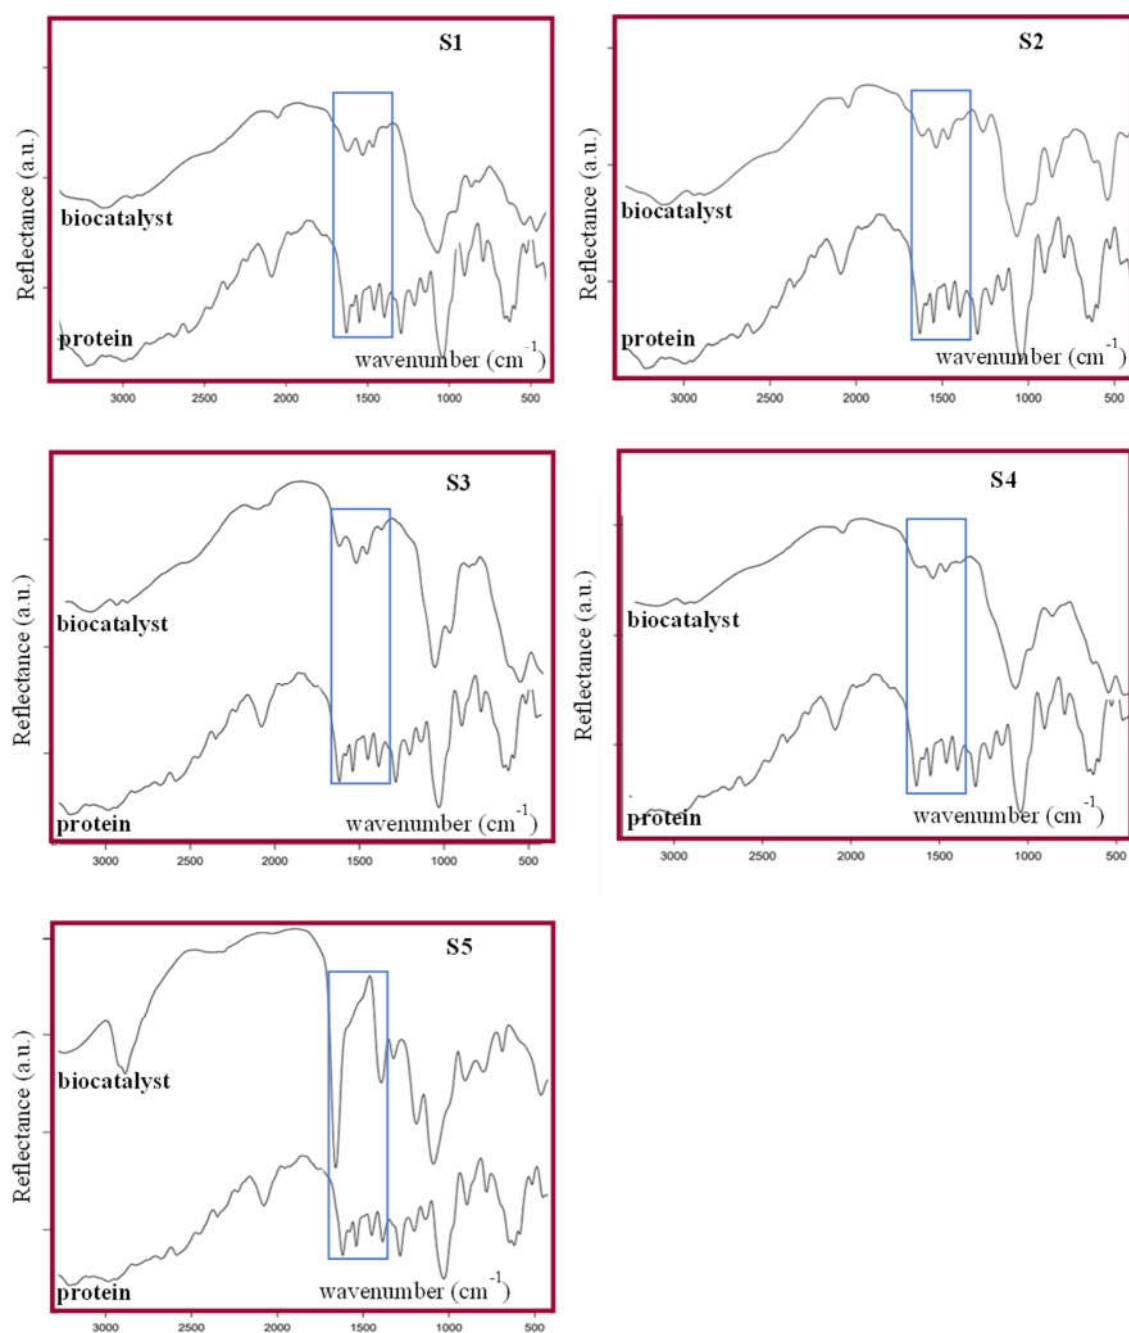

**Figure S1:** FTIR DRIFT spectra.

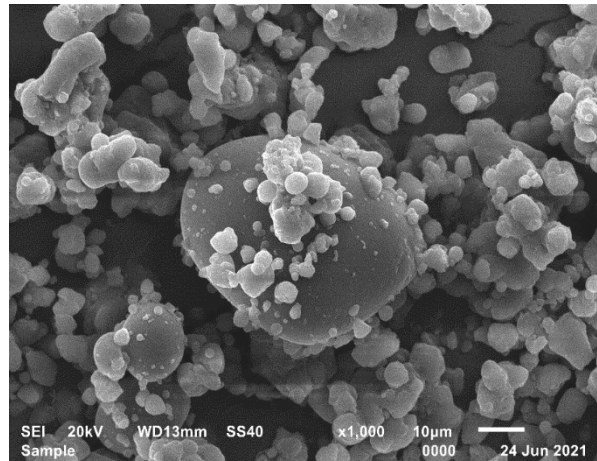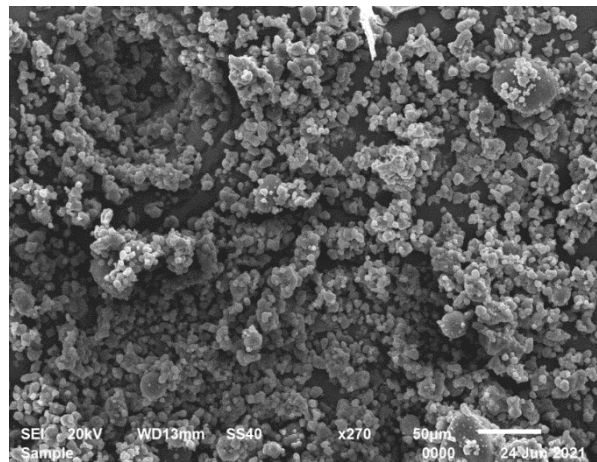

**Figure S2:** SEM micrograph of *Aspergillus niger*.

Supplement: s1 [file s1]
